# Supplementary material for: Why does the enzyme SyrB2 chlorinate, but does not hydroxylate, saturated hydrocarbons? A density functional theory (DFT) study
Source: Royal Society of Chemistry journal article supplement (doi:10.1039/b906866j), 2009-01-01
Supplement: b906866j.pdf [file b906866j.pdf]

**Why does the enzyme SyrB2 chlorinate, but does not hydroxylate, saturated hydrocarbons? A density functional theory (DFT) study**

Shanthi Pandian, Mark A Vincent, Ian H Hillier\* and Neil A Burton

School of Chemistry, University of Manchester, Oxford Road,  
Manchester, UK M13 9PL

Coordinates (Å) for the optimized structures at the B3LYP/B1 level and free energies (hartrees) at the B3LYP/B2/CPCM//B3LYP/B1 level.

1. Reac (-2560.072190)

Electronic Supplementary Information for Dalton Transactions  
This journal is © The Royal Society of Chemistry 2009

|    |             |             |             |
|----|-------------|-------------|-------------|
| C  | -1.24952300 | 2.96189800  | 0.17701200  |
| N  | -0.82725700 | 1.90629600  | -0.49593100 |
| C  | -1.11754100 | 2.12667000  | -1.82630600 |
| C  | -1.73702700 | 3.33942200  | -1.95293100 |
| N  | -1.81302700 | 3.85432200  | -0.67193500 |
| Fe | 0.33310200  | 0.32616500  | 0.30751200  |
| Cl | 0.21653900  | 0.98771300  | 2.54134100  |
| N  | -1.50395100 | -0.72791300 | 0.62308500  |
| C  | -1.98395400 | -1.13660200 | 1.78626900  |
| N  | -3.12675100 | -1.83705700 | 1.60042700  |
| C  | -3.39265200 | -1.87944300 | 0.24434400  |
| C  | -2.37429100 | -1.18731900 | -0.34848800 |
| O  | 1.16618700  | -1.54026200 | 0.07567100  |
| C  | 0.87401100  | -1.59155600 | -1.16470500 |
| C  | 1.34644000  | -2.75945500 | -1.99250100 |
| O  | 0.21306500  | -0.64358100 | -1.68404000 |
| O  | 1.70973800  | 1.08897800  | -0.01438500 |
| C  | 4.85175700  | -1.22058000 | -0.21476800 |
| C  | 5.03803400  | -0.03308800 | 0.73171400  |
| H  | 0.74322000  | -2.86001200 | -2.89590100 |
| H  | 2.38681200  | -2.57894600 | -2.28269000 |
| H  | 1.31882700  | -3.67940000 | -1.40508200 |
| H  | -3.67870800 | -2.25628300 | 2.33277500  |
| H  | -4.25529500 | -2.38391300 | -0.15996300 |
| H  | -1.53608100 | -0.92366200 | 2.74442900  |
| H  | -2.18442300 | -1.00267700 | -1.39267200 |
| H  | -1.14430000 | 3.09602600  | 1.24312500  |
| H  | -2.20132800 | 4.74699000  | -0.40888200 |
| H  | -2.11569400 | 3.87096700  | -2.81090500 |
| H  | -0.84590800 | 1.40130300  | -2.57655600 |
| H  | 3.89584600  | -1.71743700 | -0.02321600 |
| H  | 5.65149300  | -1.96186400 | -0.10124300 |
| H  | 4.85200800  | -0.89413200 | -1.26132900 |
| H  | 5.97051200  | 0.50479600  | 0.52516000  |
| H  | 4.20611800  | 0.67031000  | 0.63443700  |
| H  | 5.07047300  | -0.36172400 | 1.77615000  |

2. TS-H (-2560.051722)

|    |           |           |           |
|----|-----------|-----------|-----------|
| C  | 4.552441  | 2.324087  | -1.029078 |
| N  | 5.040026  | 1.032623  | -0.938955 |
| C  | 3.251705  | 2.256039  | -0.612194 |
| C  | 4.043329  | 0.236108  | -0.483029 |
| N  | 2.953617  | 0.952604  | -0.273355 |
| C  | 2.717545  | 0.639703  | 4.420609  |
| N  | 1.710917  | 1.587241  | 4.423673  |
| C  | 2.687690  | 0.084735  | 3.170609  |
| C  | 1.119137  | 1.574236  | 3.202729  |
| N  | 1.688737  | 0.674954  | 2.421229  |
| Fe | 1.054608  | 0.139331  | 0.267517  |
| Cl | -0.200070 | 2.125343  | 0.328643  |
| O  | 0.035933  | -1.426854 | 1.208693  |
| O  | 2.171694  | -1.696281 | 0.773878  |
| O  | 0.686894  | -0.372050 | -1.340638 |
| H  | -0.824901 | 0.614612  | -3.672136 |
| H  | 4.124298  | -0.826513 | -0.314616 |
| H  | 5.969449  | 0.727514  | -1.183219 |

Electronic Supplementary Information for Dalton Transactions  
This journal is © The Royal Society of Chemistry 2009

|   |           |           |           |
|---|-----------|-----------|-----------|
| H | 5.159151  | 3.146030  | -1.373022 |
| H | 2.504422  | 3.030486  | -0.533573 |
| H | 3.293593  | -0.704316 | 2.755263  |
| H | 0.303606  | 2.216091  | 2.905842  |
| H | 1.451844  | 2.183125  | 5.194566  |
| H | 3.339080  | 0.455541  | 5.282313  |
| C | 1.069331  | -2.165838 | 1.200274  |
| C | 0.974779  | -3.599646 | 1.660989  |
| H | 1.929129  | -3.934370 | 2.072087  |
| H | 0.176579  | -3.714301 | 2.396144  |
| H | 0.736954  | -4.228553 | 0.796212  |
| H | -0.982520 | -1.184841 | -3.652672 |
| C | -1.102475 | -0.261205 | -3.080861 |
| C | -2.406482 | -0.132676 | -2.329803 |
| H | -0.186312 | -0.320265 | -2.218088 |
| H | -2.407913 | 0.756651  | -1.693677 |
| H | -2.588812 | -1.004668 | -1.694302 |
| H | -3.251449 | -0.050383 | -3.029288 |

3. Int1 (-2560.070701)

|    |           |           |           |
|----|-----------|-----------|-----------|
| C  | 4.901847  | 2.153954  | -1.023203 |
| N  | 5.299362  | 0.833653  | -0.910724 |
| C  | 3.581323  | 2.171387  | -0.668479 |
| C  | 4.232630  | 0.105115  | -0.503060 |
| N  | 3.182810  | 0.891279  | -0.344107 |
| C  | 2.508466  | 0.685546  | 4.343471  |
| N  | 1.562027  | 1.687099  | 4.235062  |
| C  | 2.560913  | 0.102455  | 3.106793  |
| C  | 1.084721  | 1.676723  | 2.964769  |
| N  | 1.670270  | 0.728558  | 2.256567  |
| Fe | 1.200034  | 0.174365  | 0.035946  |
| Cl | -0.011241 | 2.170327  | -0.032226 |
| O  | 0.001005  | -1.306600 | 0.919045  |
| O  | 2.151493  | -1.696935 | 0.699221  |
| O  | 0.931356  | -0.386739 | -1.665790 |
| H  | 0.064780  | -0.250636 | -2.089403 |
| H  | 4.235849  | -0.960856 | -0.335053 |
| H  | 6.216829  | 0.467631  | -1.112912 |
| H  | 5.576228  | 2.933355  | -1.338856 |
| H  | 2.883573  | 2.993567  | -0.629570 |
| H  | 3.156872  | -0.728297 | 2.764170  |
| H  | 0.334218  | 2.352443  | 2.583722  |
| H  | 1.268068  | 2.314712  | 4.967196  |
| H  | 3.036624  | 0.488424  | 5.262647  |
| C  | 0.991864  | -2.097631 | 1.031174  |
| C  | 0.788765  | -3.481880 | 1.595393  |
| H  | 0.854077  | -3.431922 | 2.688072  |
| H  | -0.202512 | -3.855805 | 1.333700  |
| H  | 1.563365  | -4.160267 | 1.233942  |
| H  | -2.039012 | 0.706044  | -1.834034 |
| C  | -2.114963 | -0.194278 | -2.436611 |
| C  | -2.444310 | -1.500426 | -1.799570 |
| H  | -2.188562 | -0.069546 | -3.513156 |
| H  | -2.199408 | -2.345952 | -2.451576 |
| H  | -3.522615 | -1.577623 | -1.573515 |
| H  | -1.912753 | -1.627524 | -0.850462 |

4. TS-Cl (-2560.060889)

Electronic Supplementary Information for Dalton Transactions  
This journal is © The Royal Society of Chemistry 2009

|    |           |           |           |
|----|-----------|-----------|-----------|
| C  | 4.518184  | 2.165896  | -1.287297 |
| N  | 4.940189  | 0.849586  | -1.241703 |
| C  | 3.278577  | 2.171817  | -0.709258 |
| C  | 3.965285  | 0.114074  | -0.653430 |
| N  | 2.951320  | 0.890948  | -0.317341 |
| C  | 2.961401  | 0.682109  | 4.337027  |
| N  | 1.971030  | 1.643496  | 4.419060  |
| C  | 2.827698  | 0.128014  | 3.093999  |
| C  | 1.285170  | 1.638056  | 3.248662  |
| N  | 1.779930  | 0.732577  | 2.424588  |
| Fe | 1.058663  | 0.112174  | 0.362834  |
| Cl | -0.444900 | 2.106930  | 0.558403  |
| O  | 0.163690  | -1.481511 | 1.314336  |
| O  | 2.294441  | -1.859552 | 0.858179  |
| O  | 0.462151  | -0.201122 | -1.336799 |
| H  | -0.464694 | -0.008802 | -1.523446 |
| H  | 4.005270  | -0.950862 | -0.481517 |
| H  | 5.811594  | 0.489947  | -1.599194 |
| H  | 5.121078  | 2.949661  | -1.716642 |
| H  | 2.596447  | 2.993498  | -0.553886 |
| H  | 3.379868  | -0.675674 | 2.633988  |
| H  | 0.451587  | 2.284946  | 3.023569  |
| H  | 1.779434  | 2.239630  | 5.209155  |
| H  | 3.643941  | 0.487078  | 5.148627  |
| C  | 1.174038  | -2.264700 | 1.276955  |
| C  | 0.984249  | -3.699046 | 1.719902  |
| H  | 0.368733  | -3.739259 | 2.621825  |
| H  | 0.450285  | -4.242643 | 0.933306  |
| H  | 1.947378  | -4.181892 | 1.891951  |
| H  | -2.401299 | 3.780438  | 1.424336  |
| C  | -1.800751 | 4.030875  | 0.555200  |
| C  | -2.468148 | 4.034428  | -0.780570 |
| H  | -1.020559 | 4.763823  | 0.738198  |
| H  | -1.736568 | 4.081481  | -1.592942 |
| H  | -3.136554 | 4.904792  | -0.889668 |
| H  | -3.076746 | 3.136569  | -0.923319 |

5. TS-OH (-2560.063287)

|    |           |           |           |
|----|-----------|-----------|-----------|
| C  | 4.612395  | 1.700424  | -1.468814 |
| N  | 5.044730  | 0.421386  | -1.168538 |
| C  | 3.305752  | 1.750066  | -1.066747 |
| C  | 4.010347  | -0.251732 | -0.607057 |
| N  | 2.947653  | 0.529910  | -0.531244 |
| C  | 2.525976  | 0.940074  | 4.209885  |
| N  | 1.578718  | 1.928446  | 4.018304  |
| C  | 2.509805  | 0.196220  | 3.061699  |
| C  | 1.032941  | 1.753327  | 2.788179  |
| N  | 1.576825  | 0.712670  | 2.184399  |
| Fe | 1.004894  | -0.124831 | 0.129520  |
| Cl | -0.201854 | 1.867965  | -0.217208 |
| O  | -0.098212 | -1.531183 | 1.295227  |
| O  | 2.022440  | -1.906714 | 0.850759  |
| O  | 0.493210  | -0.918973 | -1.469277 |
| H  | -0.311114 | -0.535933 | -1.844807 |
| H  | 4.047093  | -1.275053 | -0.266020 |
| H  | 5.964596  | 0.046606  | -1.342004 |
| H  | 5.256493  | 2.432639  | -1.928324 |
| H  | 2.592697  | 2.558508  | -1.119412 |
| H  | 3.083076  | -0.679427 | 2.801755  |

Electronic Supplementary Information for Dalton Transactions  
This journal is © The Royal Society of Chemistry 2009

|   |           |           |           |
|---|-----------|-----------|-----------|
| H | 0.266328  | 2.380912  | 2.359160  |
| H | 1.326182  | 2.650658  | 4.674919  |
| H | 3.102166  | 0.861996  | 5.117985  |
| C | 0.909994  | -2.294206 | 1.346214  |
| C | 0.797041  | -3.669749 | 1.957910  |
| H | 1.720231  | -3.932792 | 2.479274  |
| H | -0.055544 | -3.720327 | 2.636556  |
| H | 0.646709  | -4.398802 | 1.154380  |
| H | 1.416806  | 0.287350  | -3.755871 |
| C | 1.426009  | -0.793605 | -3.676100 |
| C | 0.423810  | -1.619242 | -4.402107 |
| H | 2.337700  | -1.250638 | -3.312583 |
| H | 0.253131  | -2.571945 | -3.889545 |
| H | 0.750149  | -1.861455 | -5.428819 |
| H | -0.539465 | -1.105632 | -4.494695 |

6. Prod-Cl (-2560.111537)

|    |           |           |           |
|----|-----------|-----------|-----------|
| C  | -1.092782 | 2.172158  | -0.288628 |
| N  | -0.963661 | 1.093956  | -1.044303 |
| C  | -1.643112 | 1.354522  | -2.219926 |
| C  | -2.191180 | 2.606701  | -2.165257 |
| N  | -1.831451 | 3.113108  | -0.931525 |
| Fe | 0.196208  | -0.648424 | -0.677944 |
| Cl | 0.418577  | 3.079991  | 3.085329  |
| N  | -1.118408 | -1.774853 | 0.619754  |
| C  | -0.697610 | -1.992312 | 1.855541  |
| N  | -1.597446 | -2.746923 | 2.535527  |
| C  | -2.648121 | -3.031589 | 1.683619  |
| C  | -2.332943 | -2.419421 | 0.500561  |
| O  | 1.867379  | -1.016888 | -2.312644 |
| C  | 0.915573  | -1.520661 | -2.951967 |
| C  | 1.124267  | -2.111441 | -4.332248 |
| O  | -0.277880 | -1.555837 | -2.462032 |
| O  | 1.405421  | -0.238789 | 0.722124  |
| H  | 0.814630  | -3.160976 | -4.333698 |
| H  | 0.490435  | -1.589045 | -5.055604 |
| H  | 2.169365  | -2.032789 | -4.633027 |
| H  | -1.507256 | -3.049395 | 3.492956  |
| H  | -3.493565 | -3.626711 | 1.989714  |
| H  | 0.233887  | -1.604352 | 2.243451  |
| H  | -2.888149 | -2.405693 | -0.424780 |
| H  | -0.676280 | 2.311298  | 0.698641  |
| H  | -2.060387 | 4.025083  | -0.567500 |
| H  | -2.782829 | 3.169624  | -2.869116 |
| H  | -1.676586 | 0.615769  | -3.005878 |
| H  | 2.323864  | -0.307339 | 0.433423  |
| C  | 1.978483  | 2.167160  | 2.723161  |
| H  | 2.628008  | 2.904069  | 2.248085  |
| H  | 1.709882  | 1.377982  | 2.009803  |
| C  | 2.583833  | 1.613076  | 3.997963  |
| H  | 1.906804  | 0.901583  | 4.478273  |
| H  | 2.825777  | 2.402217  | 4.715432  |
| H  | 3.508819  | 1.081866  | 3.744225  |

7. Prod-OH (-2560.139266)

|   |             |             |            |
|---|-------------|-------------|------------|
| C | -1.75392200 | -1.55480900 | 2.07444100 |
| N | -1.42373900 | -1.31437600 | 0.81690800 |

Electronic Supplementary Information for Dalton Transactions  
This journal is © The Royal Society of Chemistry 2009

|    |             |             |             |
|----|-------------|-------------|-------------|
| C  | -2.21135400 | -2.14285600 | 0.03956600  |
| C  | -3.02584300 | -2.89063100 | 0.84483100  |
| N  | -2.72235000 | -2.50331200 | 2.13681500  |
| Fe | 0.11971400  | 0.05035100  | 0.12828900  |
| O  | 1.55769600  | -1.58325400 | -0.43097000 |
| C  | 0.93253600  | -1.72159100 | -1.52740300 |
| O  | -0.05436900 | -0.97260200 | -1.81419900 |
| N  | -0.96371100 | 1.70750100  | -0.68245600 |
| C  | -1.46915000 | 1.83021500  | -1.96202600 |
| C  | -2.09230700 | 3.04136400  | -2.09303000 |
| N  | -1.96272600 | 3.65853700  | -0.86253000 |
| C  | -1.27572500 | 2.82192600  | -0.04341400 |
| O  | 2.07986600  | 1.01018100  | -0.57378800 |
| Cl | 0.34286500  | 0.98398400  | 2.33176300  |
| C  | 1.37698200  | -2.77126200 | -2.52580400 |
| C  | 2.86006200  | 2.09993000  | -0.06150400 |
| C  | 3.76253700  | 1.68759200  | 1.09169200  |
| H  | 0.51763500  | -3.36731200 | -2.84564900 |
| H  | 1.77305900  | -2.27551200 | -3.41814600 |
| H  | 2.14451600  | -3.41795700 | -2.09934900 |
| H  | -3.13590400 | -2.86414500 | 2.98245800  |
| H  | -3.77028500 | -3.63984200 | 0.62767300  |
| H  | -1.31741800 | -1.05649700 | 2.92751700  |
| H  | -2.11413800 | -2.13855100 | -1.03452200 |
| H  | -1.02612700 | 3.02817500  | 0.98725300  |
| H  | -2.31456300 | 4.56902300  | -0.61082700 |
| H  | -2.60128600 | 3.50907400  | -2.92053200 |
| H  | -1.33207800 | 1.03883900  | -2.68245300 |
| H  | 2.59214200  | 0.18506500  | -0.56458200 |
| H  | 3.44800500  | 2.53428300  | -0.88272100 |
| H  | 4.33768900  | 2.54960200  | 1.44724300  |
| H  | 3.16474600  | 1.29657200  | 1.91811300  |
| H  | 4.47993500  | 0.92081400  | 0.77405900  |
| H  | 2.13526500  | 2.84833900  | 0.26842700  |

Protonated Structures (Model M1)

8. Int3 (-2560.502875)

|    |           |           |           |
|----|-----------|-----------|-----------|
| C  | 3.631061  | 1.915667  | -1.703863 |
| N  | 4.252347  | 0.688200  | -1.569341 |
| C  | 2.512876  | 1.852027  | -0.923145 |
| C  | 3.522151  | -0.075525 | -0.734140 |
| N  | 2.455538  | 0.604186  | -0.321225 |
| C  | 3.159735  | 0.981422  | 4.524433  |
| N  | 2.055915  | 1.808293  | 4.607040  |
| C  | 2.998900  | 0.265667  | 3.373387  |
| C  | 1.270578  | 1.586332  | 3.535993  |
| N  | 1.815030  | 0.651008  | 2.761787  |
| Fe | 0.996650  | -0.131922 | 0.978491  |
| Cl | -0.566741 | 1.468822  | 0.816072  |
| O  | 0.205098  | -1.771076 | 1.894723  |
| O  | 2.298715  | -1.829897 | 1.293579  |
| O  | 0.145593  | -1.177182 | -0.711118 |
| H  | -0.251922 | -0.658007 | -1.456154 |
| H  | 3.767477  | -1.084770 | -0.442270 |
| H  | 5.110535  | 0.403857  | -2.020835 |
| H  | 4.030620  | 2.700228  | -2.325964 |
| H  | 1.750066  | 2.594967  | -0.751242 |

Electronic Supplementary Information for Dalton Transactions  
This journal is © The Royal Society of Chemistry 2009

|   |           |           |           |
|---|-----------|-----------|-----------|
| H | 3.626434  | -0.498439 | 2.945002  |
| H | 0.340474  | 2.096654  | 3.339389  |
| H | 1.860420  | 2.469540  | 5.345702  |
| H | 3.936336  | 0.978146  | 5.272148  |
| H | -0.560116 | -1.751760 | -0.376137 |
| C | 1.315792  | -2.416928 | 1.845244  |
| C | 1.429847  | -3.784137 | 2.443207  |
| H | 1.576876  | -3.682456 | 3.524242  |
| H | 0.504985  | -4.342909 | 2.288649  |
| H | 2.281968  | -4.318208 | 2.022103  |
| H | -1.469338 | 1.107217  | -2.254315 |
| C | -1.198846 | 0.301535  | -2.932742 |
| C | -2.250368 | -0.619324 | -3.446423 |
| H | -0.280407 | 0.434158  | -3.501210 |
| H | -1.831724 | -1.543928 | -3.856718 |
| H | -2.806174 | -0.139438 | -4.269968 |
| H | -2.992503 | -0.870061 | -2.681933 |

9. TSprot-Cl (-2560.500259)

|    |           |           |           |
|----|-----------|-----------|-----------|
| C  | 4.221436  | 1.910950  | -1.573673 |
| N  | 4.878257  | 0.727749  | -1.293981 |
| C  | 2.979646  | 1.783066  | -1.020285 |
| C  | 4.046736  | -0.071539 | -0.597092 |
| N  | 2.881552  | 0.541426  | -0.412556 |
| C  | 2.396087  | 1.093100  | 4.489168  |
| N  | 1.253991  | 1.837146  | 4.264115  |
| C  | 2.565680  | 0.330938  | 3.369252  |
| C  | 0.769406  | 1.520608  | 3.047023  |
| N  | 1.543800  | 0.605115  | 2.472710  |
| Fe | 1.250094  | -0.301805 | 0.589876  |
| Cl | -0.418791 | 1.095017  | -0.034060 |
| O  | 0.419873  | -2.028362 | 1.328882  |
| O  | 2.597092  | -1.872508 | 1.261967  |
| O  | 0.822495  | -1.456163 | -1.273555 |
| H  | 0.243898  | -0.927507 | -1.846037 |
| H  | 4.292404  | -1.058903 | -0.238344 |
| H  | 5.822436  | 0.493222  | -1.566430 |
| H  | 4.685039  | 2.712544  | -2.125580 |
| H  | 2.155650  | 2.479001  | -1.016059 |
| H  | 3.326924  | -0.397382 | 3.141913  |
| H  | -0.117946 | 1.952246  | 2.610491  |
| H  | 0.842635  | 2.504536  | 4.901290  |
| H  | 2.966193  | 1.172294  | 5.400679  |
| H  | 0.275971  | -2.192665 | -0.956291 |
| C  | 1.569645  | -2.545478 | 1.583012  |
| C  | 1.670489  | -3.876386 | 2.265029  |
| H  | 1.586078  | -3.721499 | 3.346496  |
| H  | 0.848124  | -4.525622 | 1.959744  |
| H  | 2.633390  | -4.343554 | 2.056031  |
| H  | -1.808841 | 1.853681  | -2.473363 |
| C  | -1.914514 | 0.777041  | -2.526516 |
| C  | -3.142634 | 0.113287  | -2.035335 |
| H  | -1.232842 | 0.260113  | -3.198104 |
| H  | -3.003508 | -0.957846 | -1.860914 |
| H  | -3.945765 | 0.206201  | -2.787768 |
| H  | -3.516059 | 0.578882  | -1.119202 |

10. Prodprot-Cl (-2560.55587)

Electronic Supplementary Information for Dalton Transactions  
This journal is © The Royal Society of Chemistry 2009

|    |           |           |           |
|----|-----------|-----------|-----------|
| N  | 1.632115  | -0.820248 | 2.533212  |
| C  | 1.692698  | 0.489334  | 2.982069  |
| C  | 1.165440  | 0.563325  | 4.240881  |
| N  | 0.776244  | -0.723070 | 4.555024  |
| C  | 1.071013  | -1.525569 | 3.510493  |
| Fe | 2.125388  | -1.771589 | 0.742572  |
| O  | 1.190480  | -0.445855 | -0.590303 |
| N  | 4.199609  | -1.847637 | 0.640595  |
| C  | 5.186570  | -1.233403 | 1.393242  |
| C  | 6.412365  | -1.627608 | 0.937065  |
| N  | 6.157803  | -2.494051 | -0.107557 |
| C  | 4.822399  | -2.604994 | -0.258229 |
| Cl | -1.126381 | 1.598708  | 0.413263  |
| O  | 1.850609  | -3.159794 | -0.935764 |
| C  | 1.217718  | -3.900594 | -0.118507 |
| C  | 0.608853  | -5.205205 | -0.554317 |
| O  | 1.067117  | -3.503513 | 1.091643  |
| C  | -1.855908 | 2.721495  | -0.854326 |
| C  | -1.976759 | 2.046181  | -2.204429 |
| H  | 4.948055  | -0.562690 | 2.203972  |
| H  | 7.413233  | -1.379691 | 1.251476  |
| H  | 6.851273  | -2.970245 | -0.666916 |
| H  | 4.328914  | -3.216611 | -0.998932 |
| H  | 0.856612  | -2.583356 | 3.468826  |
| H  | 0.336254  | -1.017787 | 5.415254  |
| H  | 1.031374  | 1.389538  | 4.920265  |
| H  | 2.102585  | 1.282400  | 2.375585  |
| H  | 0.772181  | -5.970031 | 0.208206  |
| H  | 1.017253  | -5.524691 | -1.513049 |
| H  | -0.473931 | -5.074916 | -0.655733 |
| H  | 0.481876  | 0.197137  | -0.396814 |
| H  | -1.200258 | 3.591768  | -0.872606 |
| H  | -2.822950 | 3.002322  | -0.437878 |
| H  | -0.997869 | 1.766722  | -2.603923 |
| H  | -2.436379 | 2.750310  | -2.906649 |
| H  | -2.609457 | 1.156833  | -2.152518 |
| H  | 0.978188  | -0.896676 | -1.420235 |
